# Supplementary figures and images for: Photodestruction of Diatomic Molecular Ions: Laboratory and Astrophysical Application
Source: MDPI journal article supplement (doi:10.3390/molecules26010151), 2020-12-31

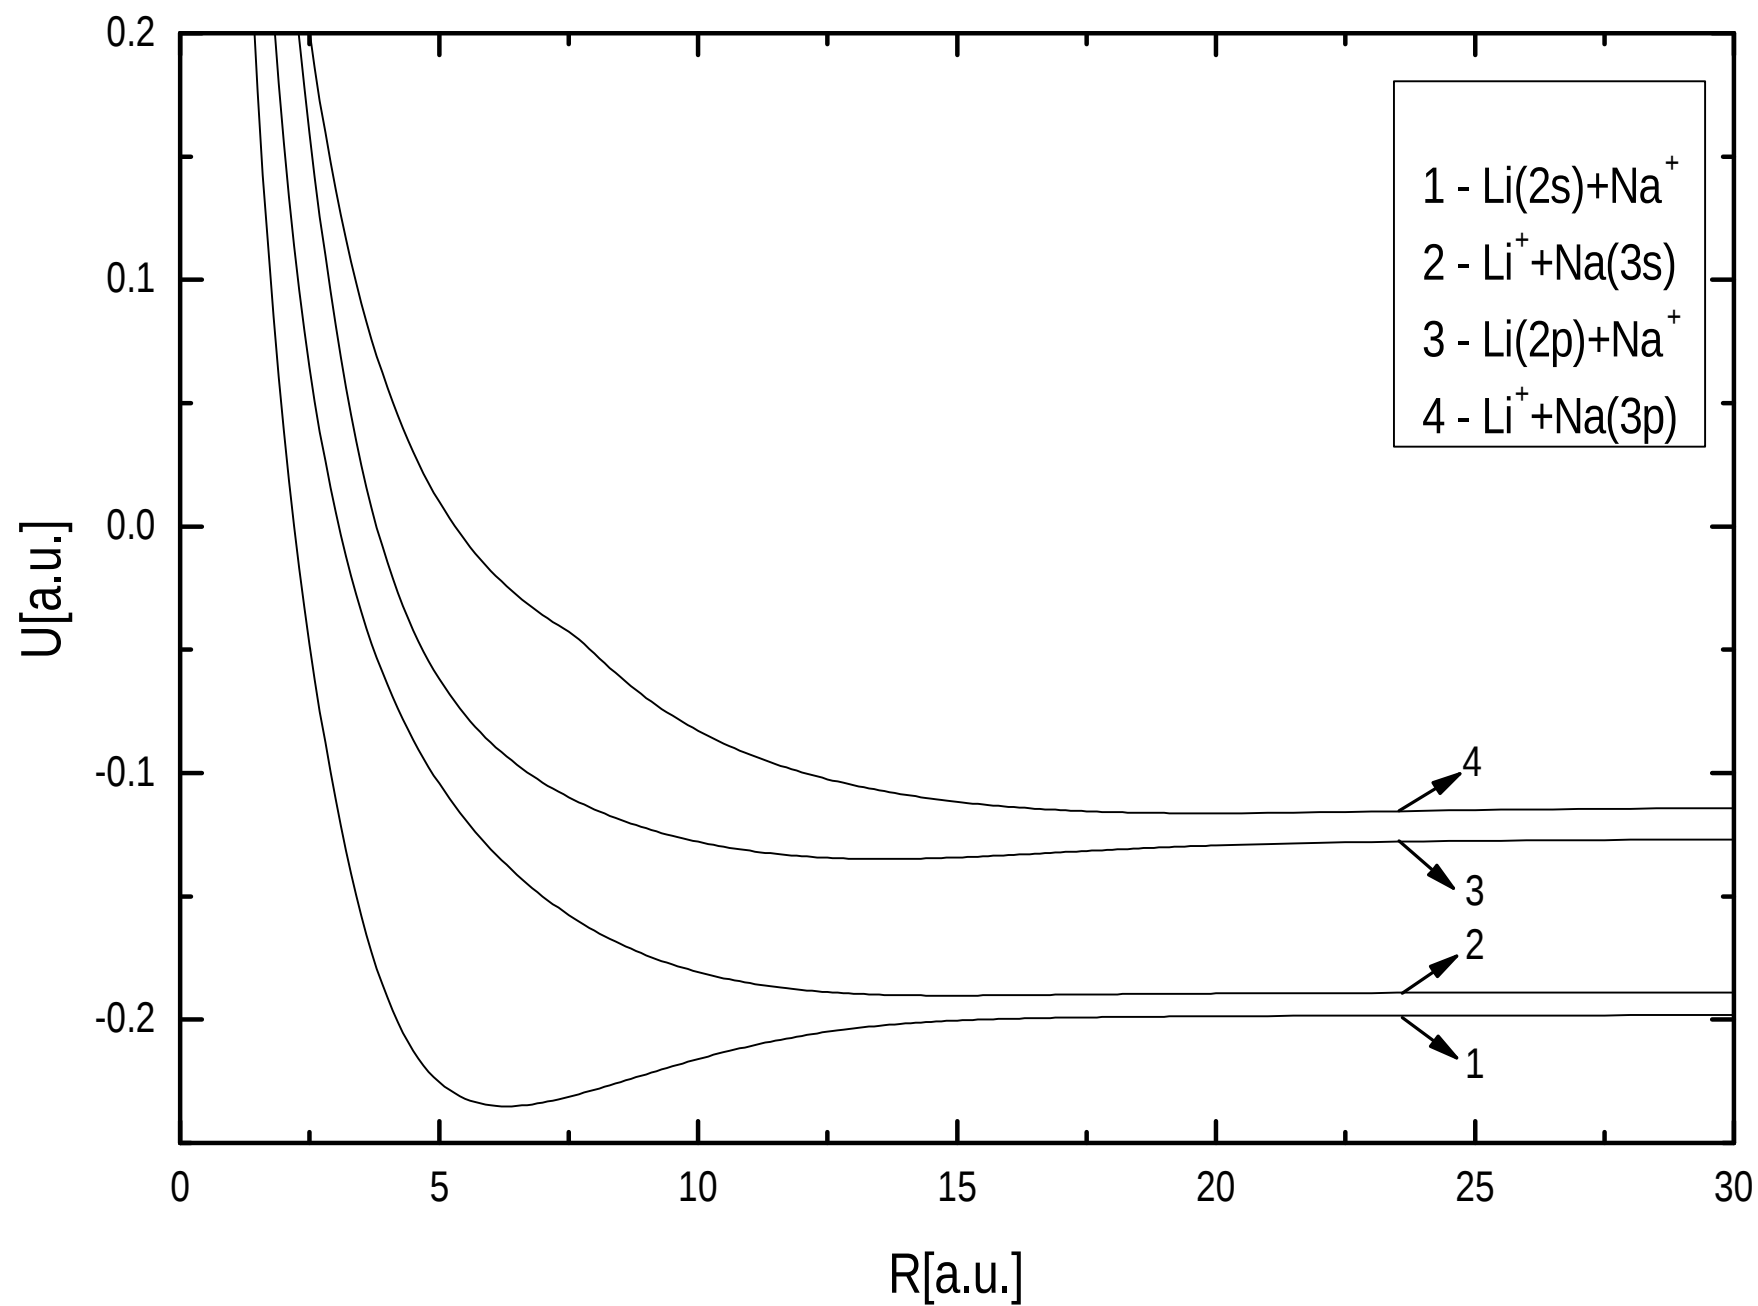

Supplement: s1 [file s1]

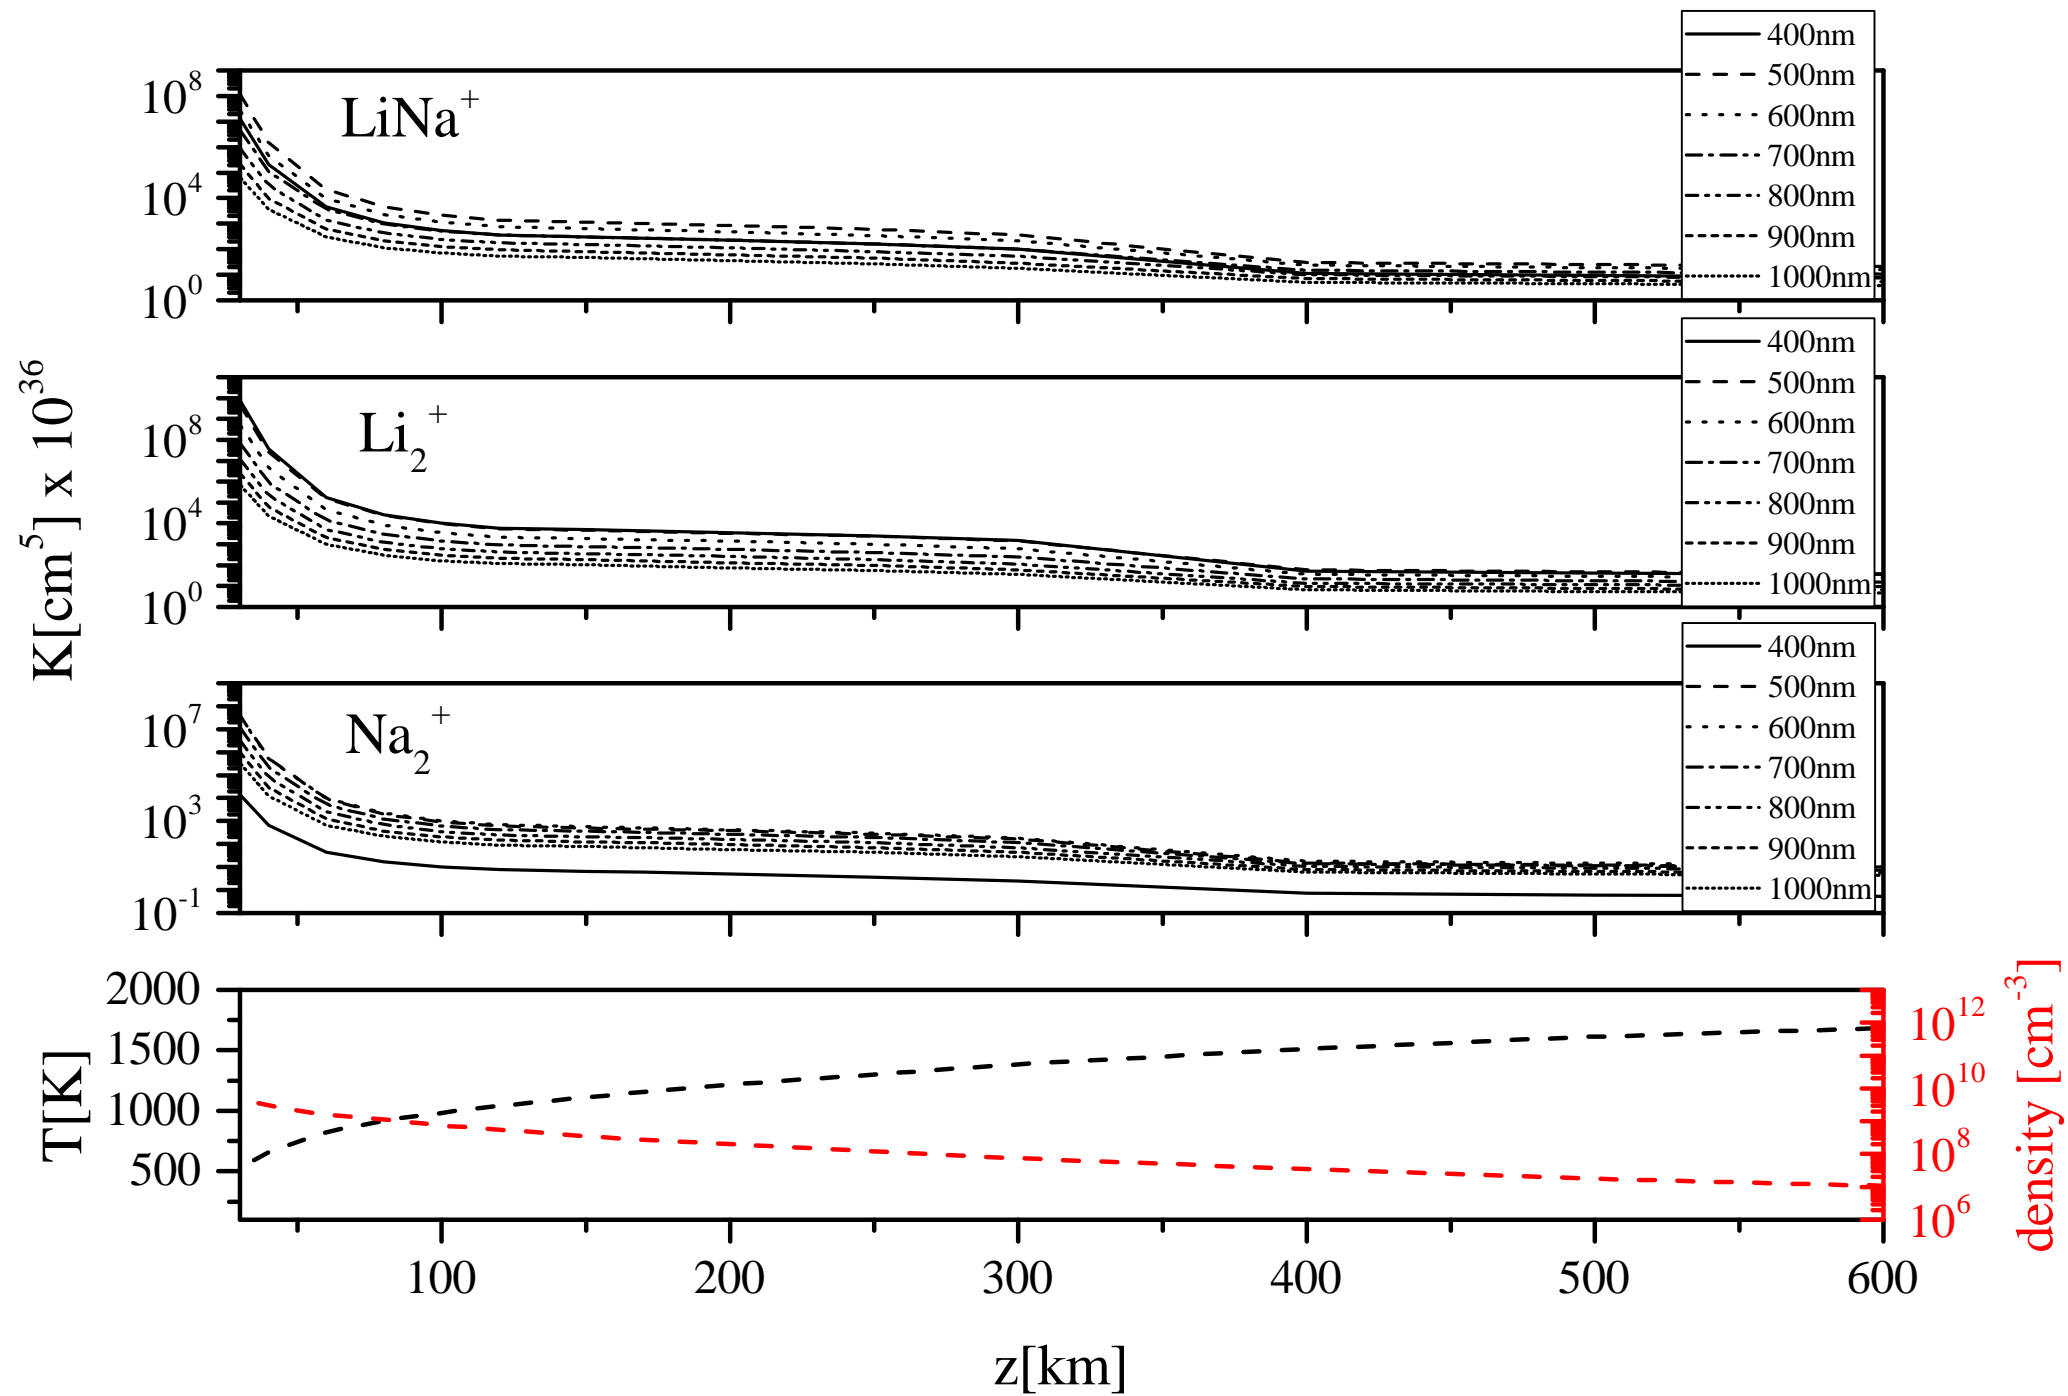

Supplement: s1 [file s1]

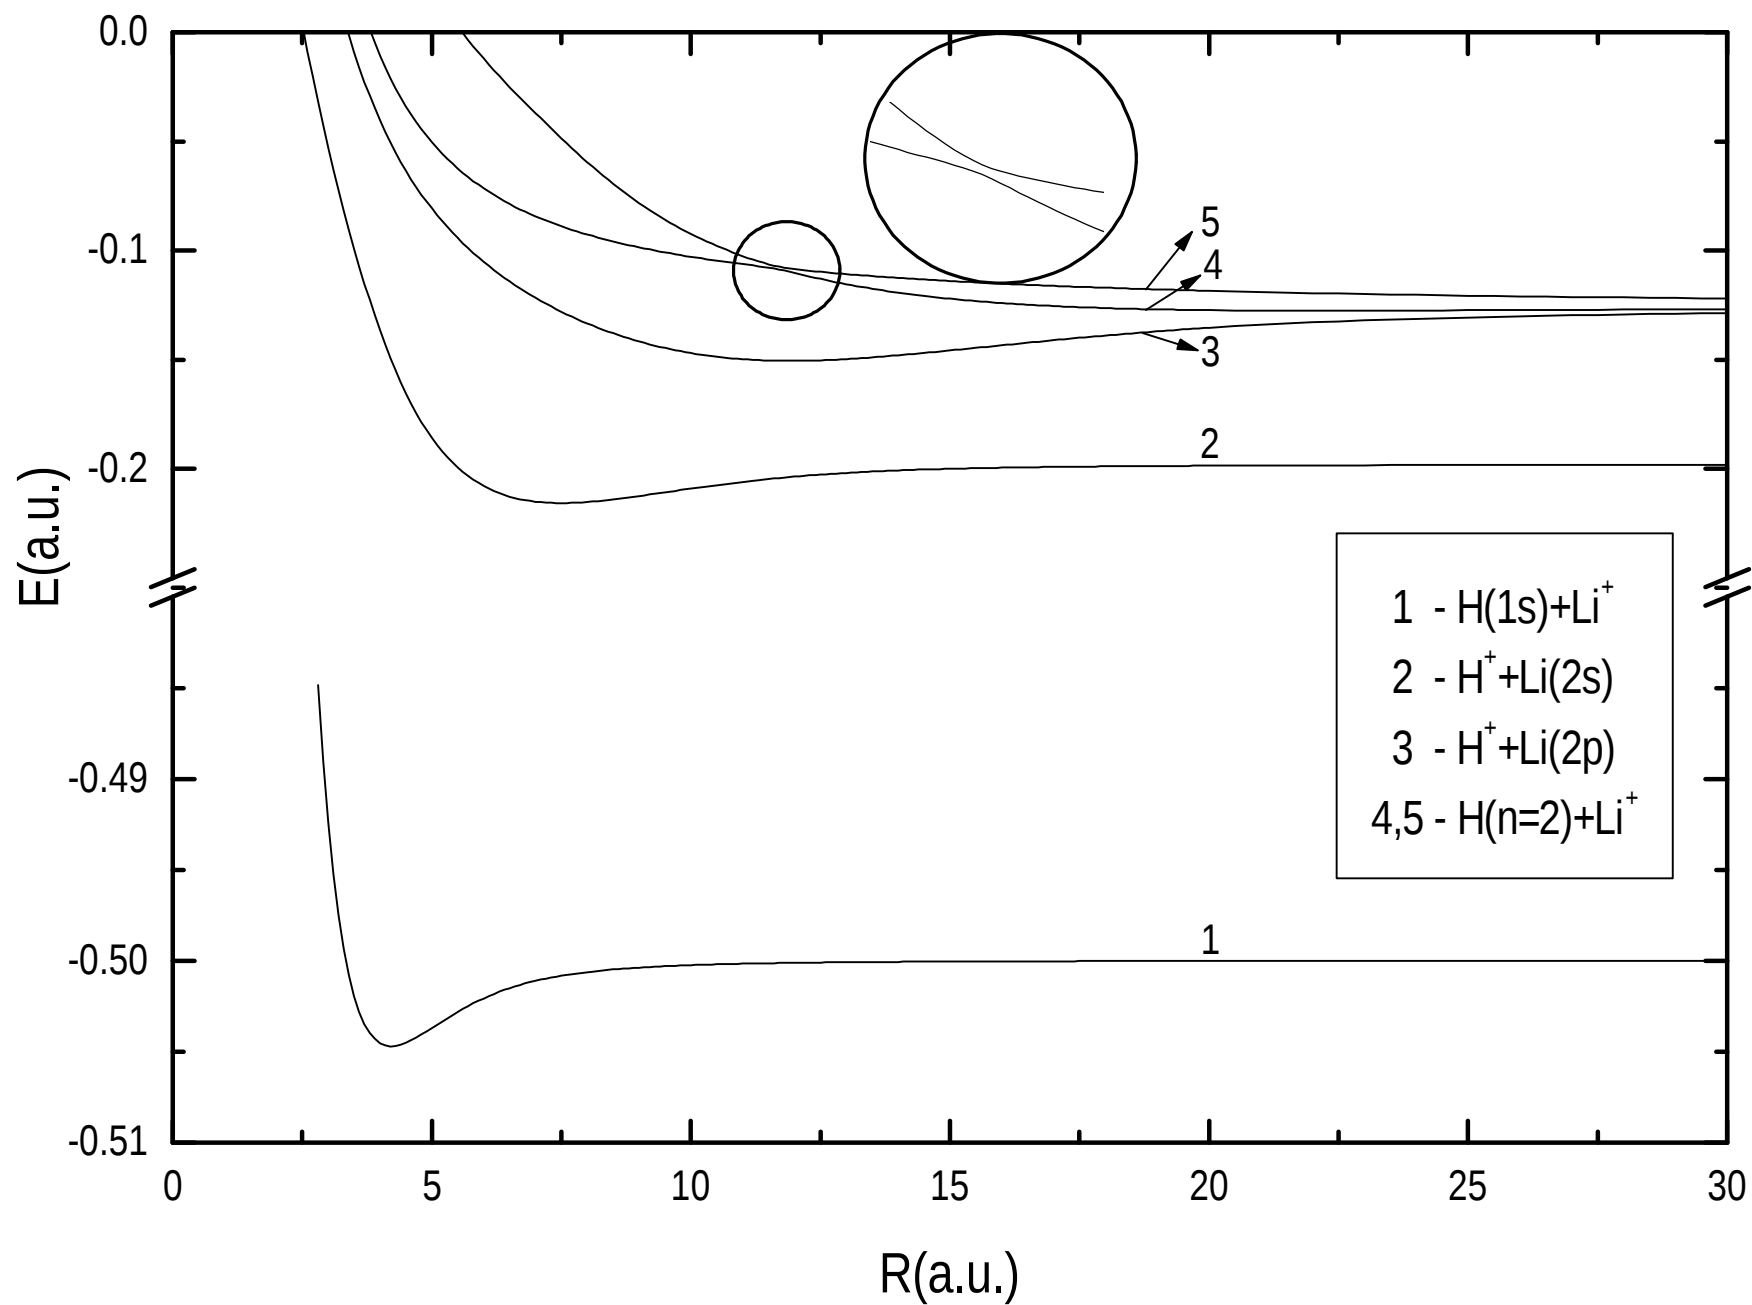

Supplement: s1 [file s1]

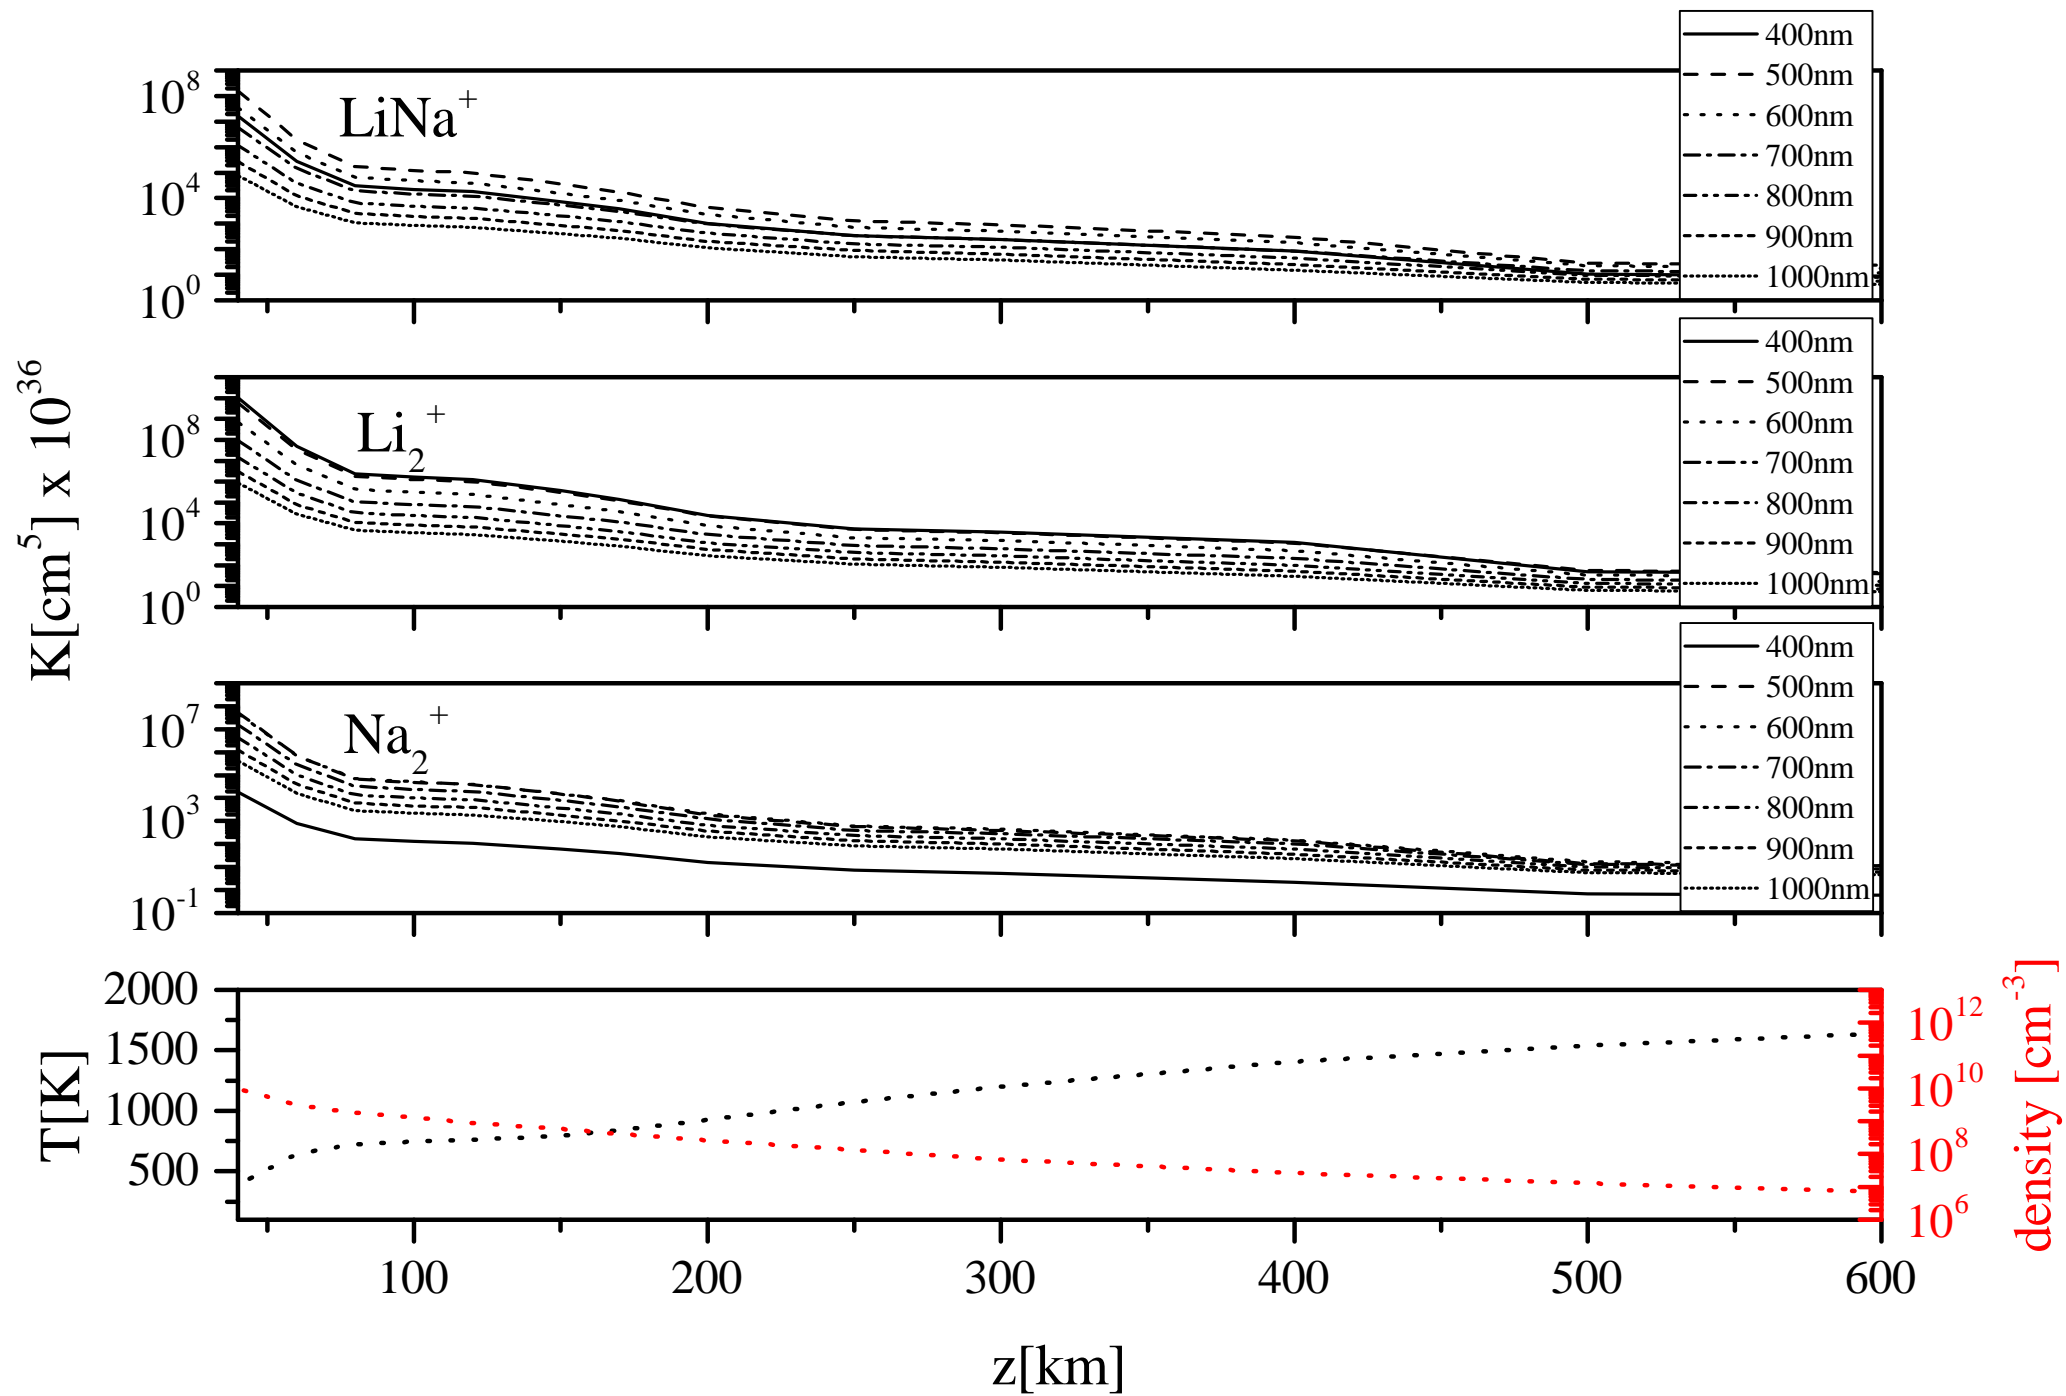

Supplement: s1 [file s1]

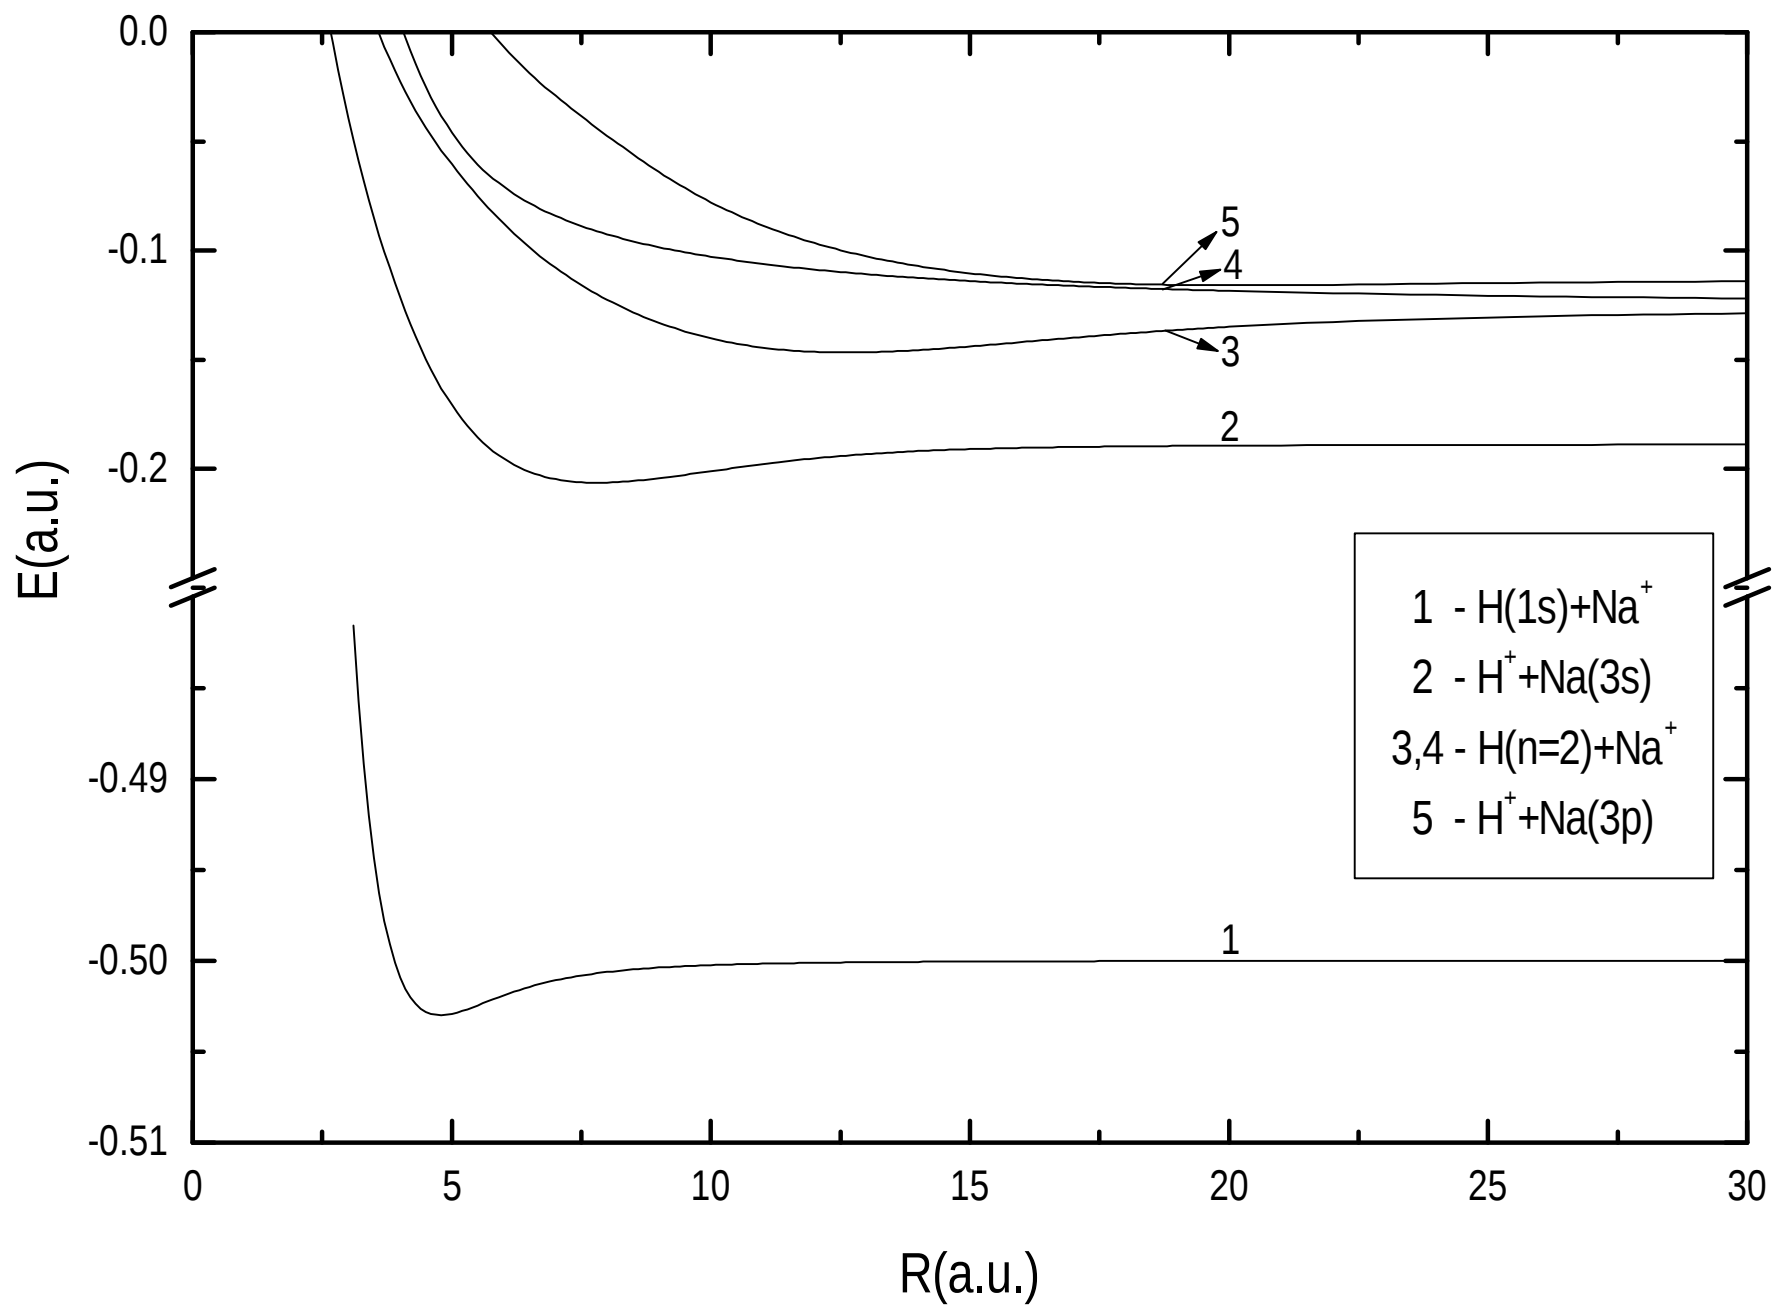

Supplement: s1 [file s1]

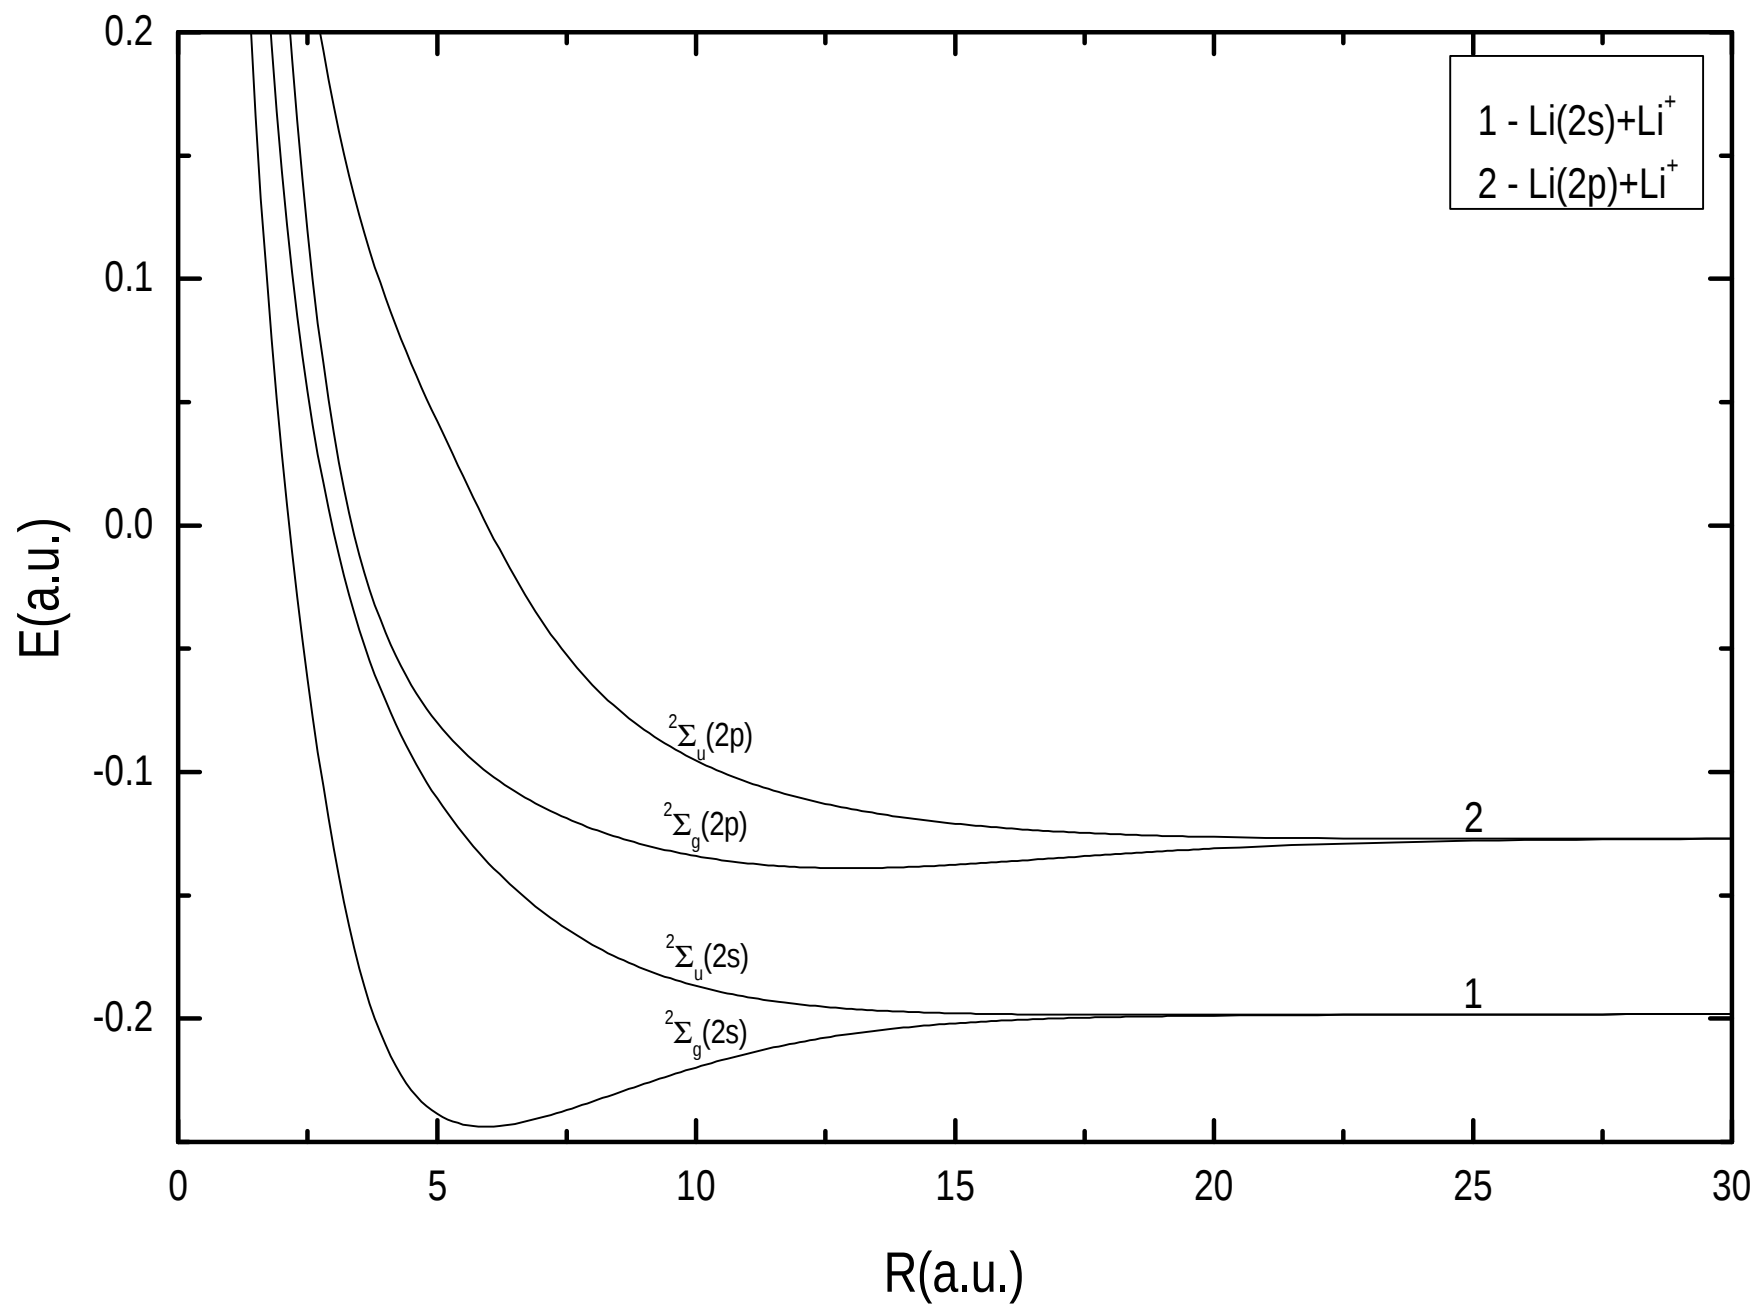

Supplement: s1 [file s1]

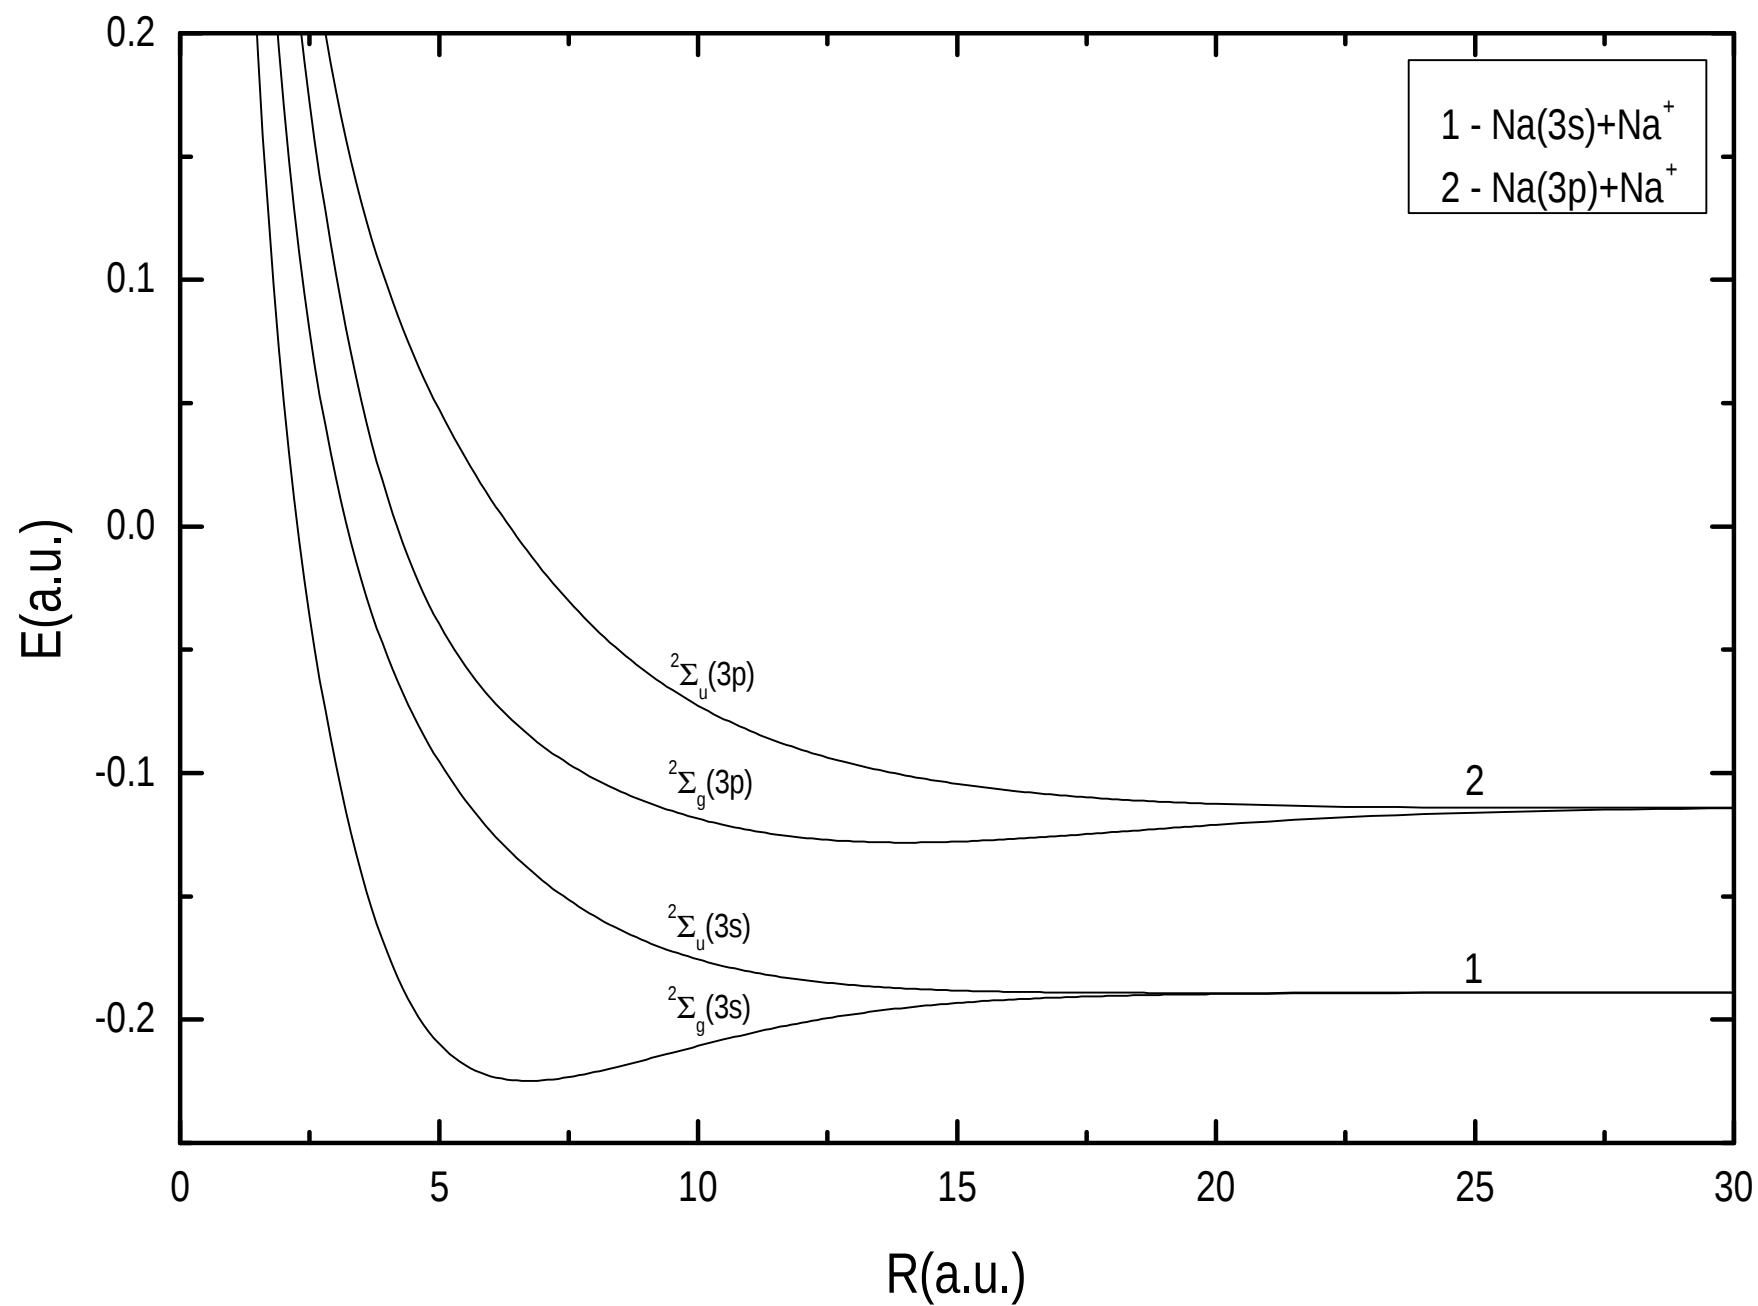

Supplement: s1 [file s1]
